# Supplementary material for: Short measures of youth psychopathology: Psychometric properties of the Brief Problem Monitor (BPM) and Behavior and Feelings Survey (BFS) in a Norwegian clinical sample
Source: Research Square preprint supplement (doi:10.21203/rs.3.rs-1315138/v1), 2022-02-04
Supplement: Supplementary file 1 [file 870177bcb72d5c4897677ccf.docx]

**Appendix 2. List of ICD codes dummy coded as internalizing and externalizing diagnoses.**

**Internalizing diagnoses:**

**F30-F39**

**F40-F48**

**F50-F59**

**F92-F93**

**F940-F942**

**Externalizing diagnoses:**

**F50-F59**

**F90-F92**

**F941-F942**
